# Supplementary material for: De novo sequencing, assembly and analysis of eight different transcriptomes from the Malayan pangolin
Source: PubMed Central journal article supplement (PMC5020319; doi:10.1038/srep28199), 2016-09-13
Supplement: srep28199-s1.pdf [file srep28199-s1.pdf]

# ***De novo* sequencing, assembly and analysis of eight different transcriptomes from the Malayan pangolin**

## **The International Pangolin Research Consortium (IPaRC)**

Aini Mohamed Yusoff<sup>1,4</sup>, Tze King Tan<sup>1,4</sup>, Ranjeev Hari<sup>1,4</sup>, Klaus-Peter Koepfli<sup>7</sup>, Wei Yee Wee<sup>1,4</sup>, Agostinho Antunes<sup>8,9</sup>, Frankie Thomas Sitam<sup>5</sup>, Jeffrine Rovie Ryan Japning<sup>5</sup>, Kayal Vizi Karuppanan<sup>5</sup>, Guat Jah Wong<sup>1</sup>, Leonard Lipovich<sup>10,11</sup>, Wesley C. Warren<sup>3</sup>, Stephen J. O'Brien<sup>2,6</sup>, Siew Woh Choo<sup>1,4</sup>

## **Affiliation addresses**

<sup>1</sup>Genome Informatics Research Laboratory, High Impact Research (HIR) Building, University of Malaya, 50603 Kuala Lumpur, Malaysia.

<sup>2</sup>Theodosius Dobzhansky Center for Genome Bioinformatics St. Petersburg State University St. Petersburg, Russia 199004

<sup>3</sup>McDonnell Genome Institute, Washington University, St Louis, MO 63108, USA.

<sup>4</sup>Department of Oral Biology and Biomedical Sciences, Faculty of Dentistry, University of Malaya, 50603 Kuala Lumpur, Malaysia

<sup>5</sup>Ex-Situ Conservation Division, Department of Wildlife and National Parks, 10 Jalan Cheras, 56100 Kuala Lumpur, Malaysia.

<sup>6</sup>Oceanographic Center, 8000 N. Ocean Drive, Nova Southeastern University, Ft Lauderdale, Florida 33004, USA.

<sup>7</sup>National Zoological Park, Smithsonian Conservation Biology Institute, Washington, DC 20008, USA

<sup>8</sup>CIIMAR/CIMAR, Interdisciplinary Centre of Marine and Environmental Research, University of Porto, Rua dos Bragas, 177, 4050-123 Porto, Portugal.

<sup>9</sup>Department of Biology, Faculty of Sciences, University of Porto, Rua do Campo Alegre, 4169-007 Porto, Portugal.

<sup>10</sup>Center for Molecular Medicine and Genetics, Wayne State University, Detroit, MI 48201, USA.

<sup>11</sup>Department of Neurology, School of Medicine, Wayne State University, Detroit, MI 48201, USA.

Corresponding author:

Siew Woh Choo

lchoo@um.edu.my or [lchoo@genomesolutions.com.my](mailto:lchoo@genomesolutions.com.my)

## Supplementary Figures

**Supplementary Figure 1: Table of Bioanalyzer results indicating the quality of RNA extracted from respective tissue.**

| Organ/ details                                                                                      | Electropherogram                                                                     |
|-----------------------------------------------------------------------------------------------------|--------------------------------------------------------------------------------------|
| <p><b>Cerebellum</b></p> <p>RIN: 10.0</p> <p>RNA area:196.6</p> <p>RNA concentration: 113 ng/μl</p> | 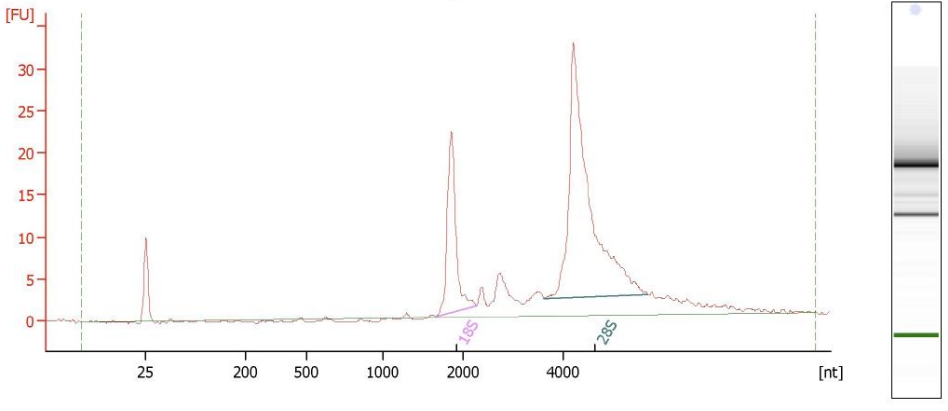   |
| <p><b>Cerebrum</b></p> <p>RIN: 10.0</p> <p>RNA area: 140.1</p> <p>RNA concentration: 120 ng/μl</p>  |   |
| <p><b>Heart</b></p> <p>RIN: 9.30</p> <p>RNA area:187.3</p> <p>RNA concentration: 107 ng/μl</p>      |  |

| Organ/ details                                                                                  | Electropherogram                                                                     |                                                                                       |
|-------------------------------------------------------------------------------------------------|--------------------------------------------------------------------------------------|---------------------------------------------------------------------------------------|
| <p><b>Kidney</b></p> <p>RIN: 9.90</p> <p>RNA area:639.6</p> <p>RNA concentration: 550 ng/μl</p> | 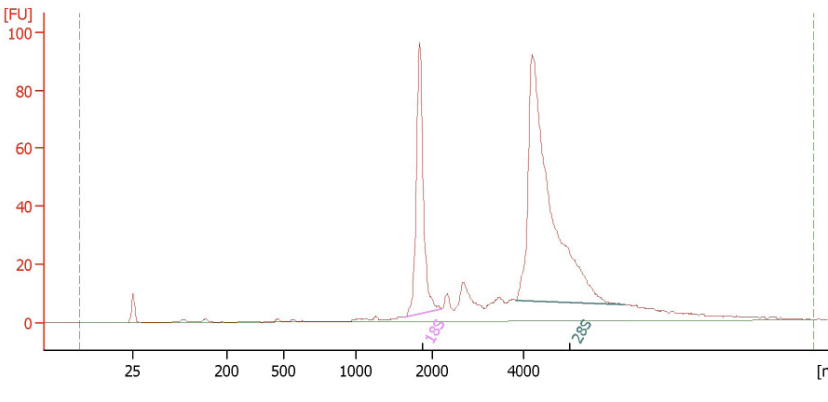   |    |
| <p><b>Liver</b></p> <p>RIN: 9.10</p> <p>RNA area:441.7</p> <p>RNA concentration: 253 ng/μl</p>  |   |   |
| <p><b>Lungs</b></p> <p>RIN: 10.0</p> <p>RNA area:324.7</p> <p>RNA concentration: 279 ng/μl</p>  |  |  |

| Organ/ details                                                                                  | Electropherogram                                                                    |
|-------------------------------------------------------------------------------------------------|-------------------------------------------------------------------------------------|
| <p><b>Spleen</b></p> <p>RIN: 9.80</p> <p>RNA area:544.0</p> <p>RNA concentration: 312 ng/μl</p> | 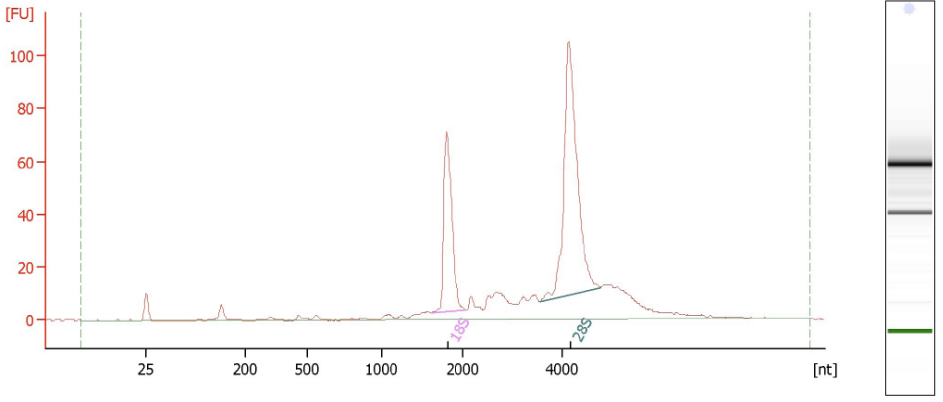  |
| <p><b>Thymus</b></p> <p>RIN: 9.60</p> <p>RNA area:236.9</p> <p>RNA concentration: 204 ng/μl</p> |  |

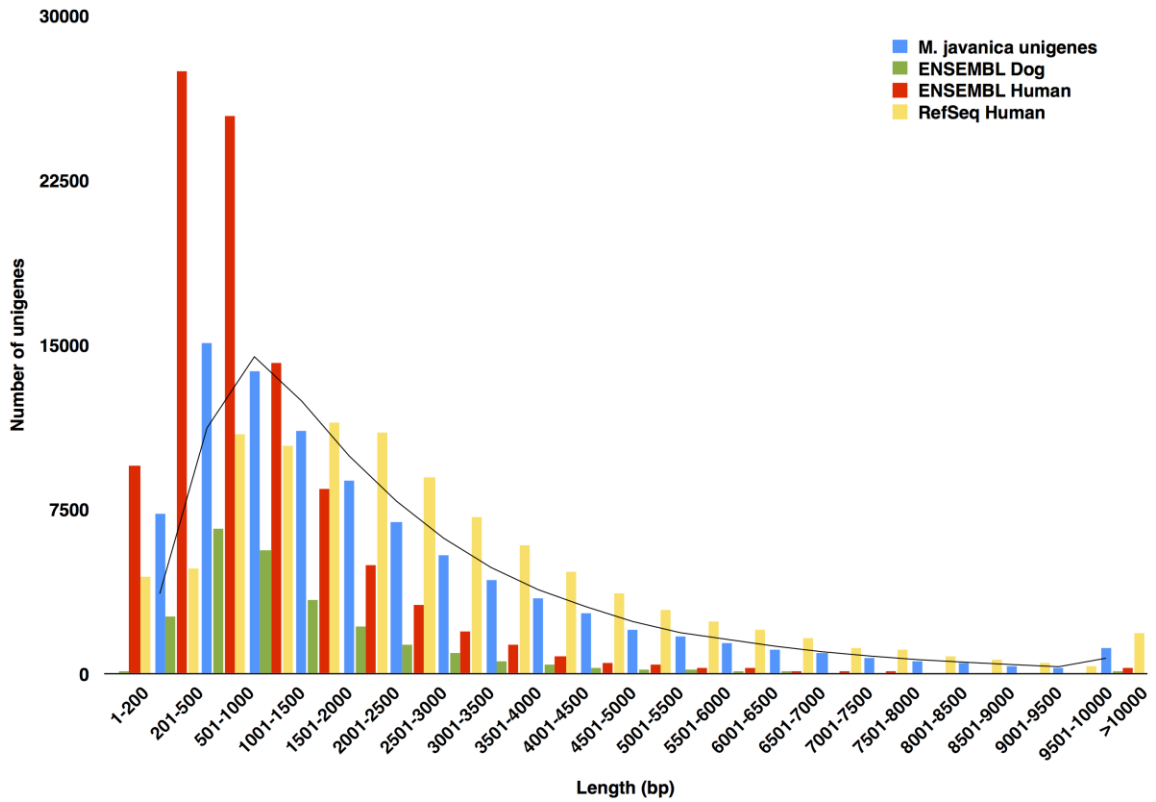

**Supplementary Figure 2: *M. javanica* unigene length distribution in comparison with ENSEMBL dog and human genes, and RefSeq human genes.**

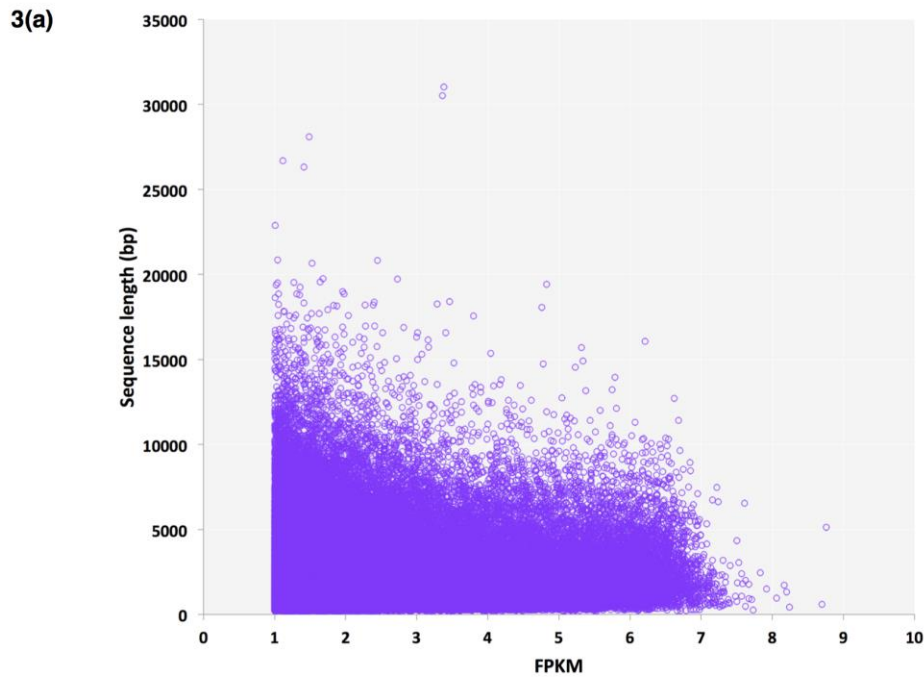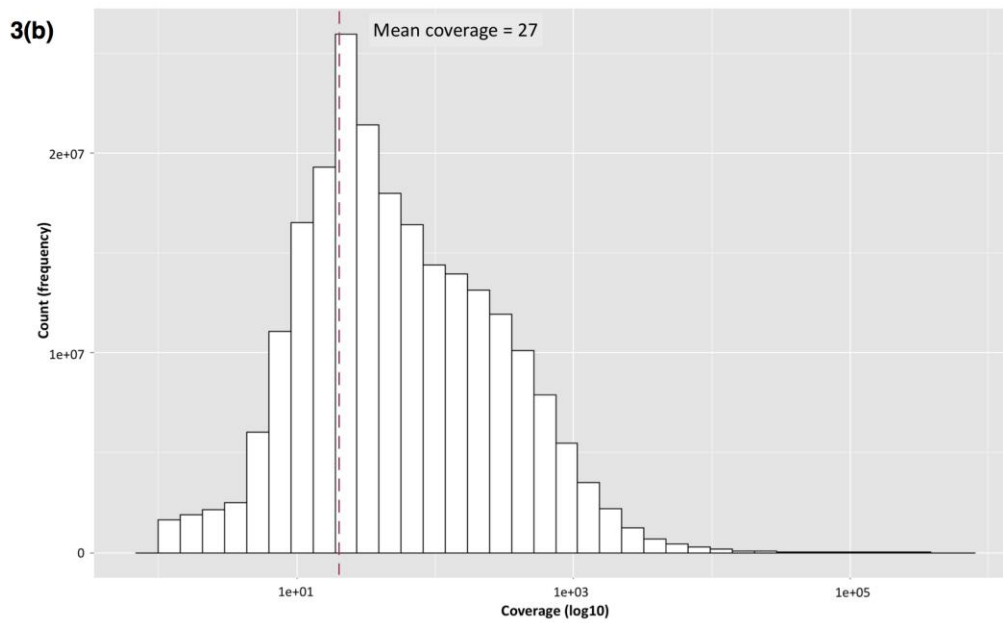

**Supplementary Figure 3: *M. javanica* transcript validation and quality assessment.** Figure 3a) describes the relationship between FPKM values and unigene length. The minimum supported FPKM is 1.00. Figure 3b) shows the mapping coverage distribution of *M. javanica* unigenes. The red dotted line indicates the mean mapping coverage, denoting the quality of mapping.

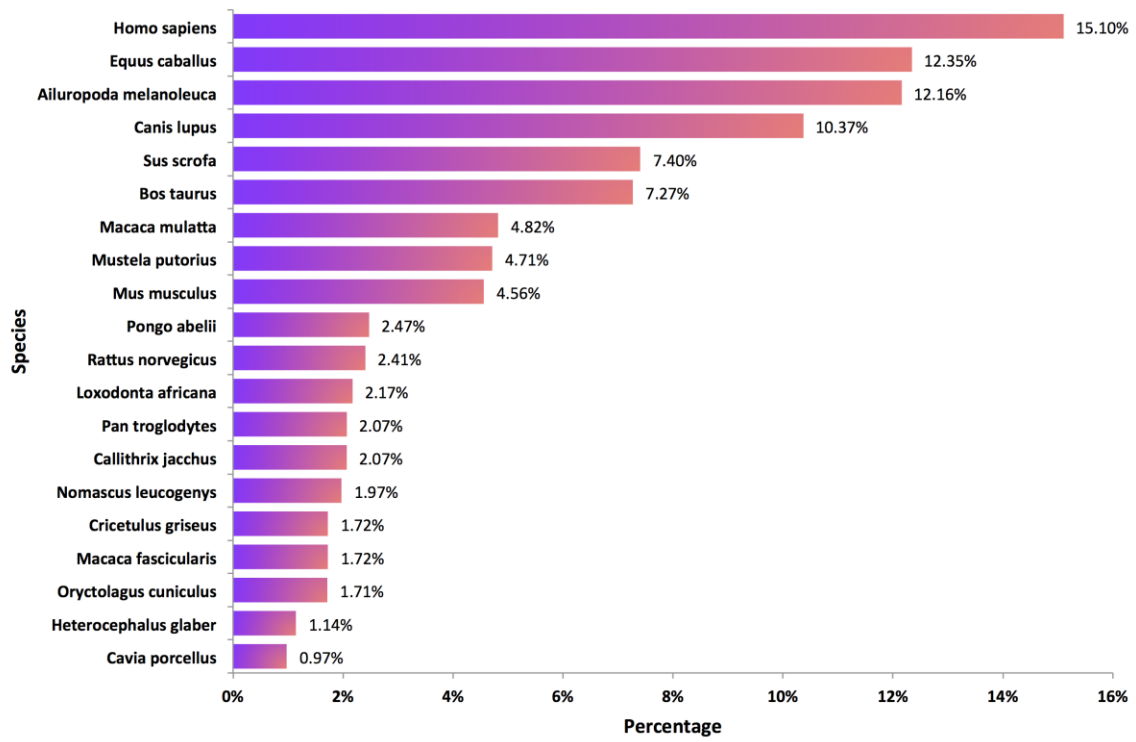

**Supplementary Figure 4: Top 20 BLAST hits distribution to known species.**

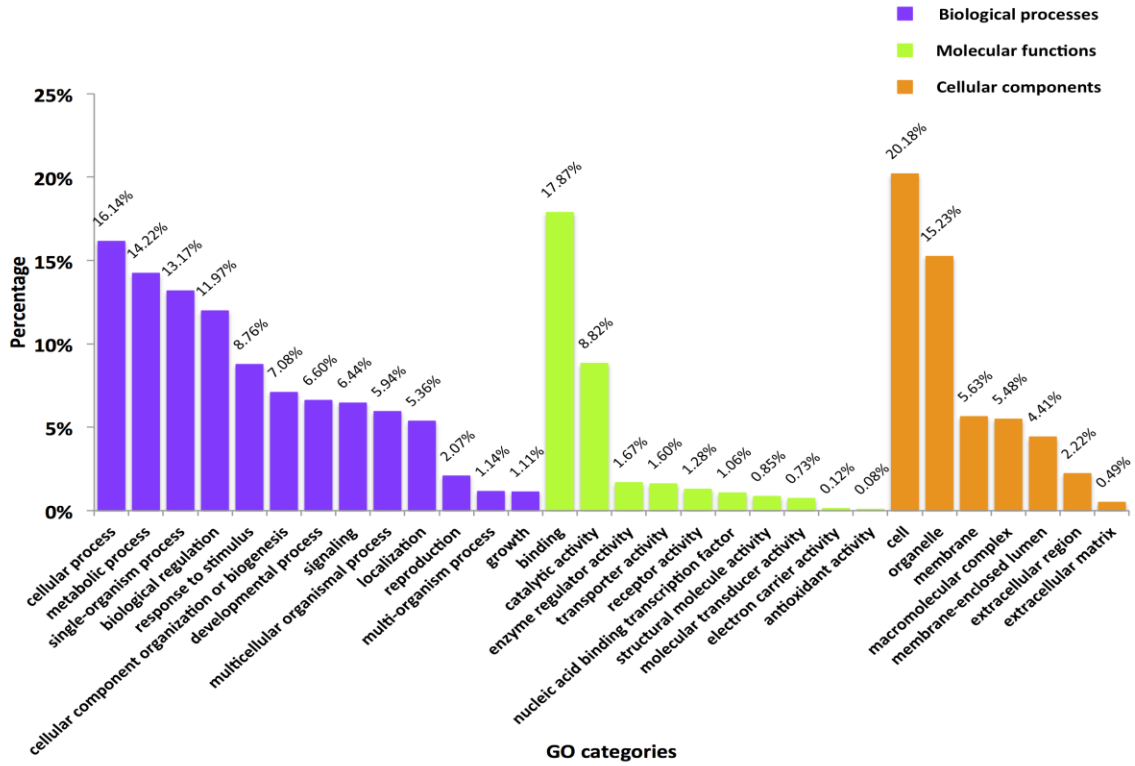

**Supplementary Figure 5: Functional classification of assembled *M. javanica* unigenes.**

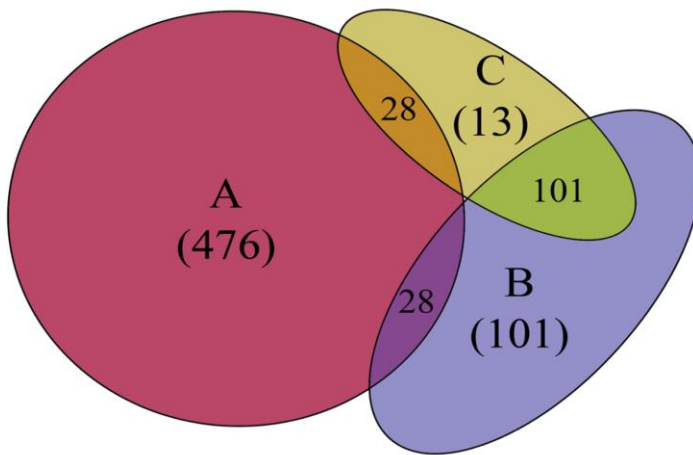

**Supplementary Figure 6: Mapping of unigenes to metabolic pathways.** A=Glycerolipid metabolism; B=Fatty acid degradation; and C=Linoleic and alpha-linolenic metabolism.
